# Supplementary material
Source: PubMed Central journal article supplement (PMC5726525)
Supplement: NIHMS908509-supplement-2.pdf [file NIHMS908509-supplement-2.pdf]

**Supplementary Table 1. Numbers of cells positive to excitatory and inhibitory neuron markers.**

| <b>Target</b> | <i>Arid1b</i> <sup>+/+</sup> | <i>Arid1b</i> <sup>+/-</sup> | <b>P value</b> |
|---------------|------------------------------|------------------------------|----------------|
| <b>P28</b>    |                              |                              |                |
| CUX1          | 504.2 ± 50.9                 | 468.8 ± 8.2                  | -              |
| TBR1          | 1331.5 ± 117.3               | 1326.5 ± 107.7               | -              |
| NeuN          | 1232.4 ± 17.6                | 1096.0 ± 75.3                | -              |
| Olig2         | 287.9 ± 10.7                 | 300.6 ± 11.0                 | -              |
| Somatostatin  | 61.1 ± 2.4                   | 56.3 ± 6.8                   | -              |
| Calbindin     | 62.2 ± 3.9                   | 51.8 ± 2.0                   | -              |
| Calretinin    | 76.0 ± 3.6                   | 74.8 ± 3.0                   | -              |
| GABA          | 152.2 ± 5.4                  | 111.2 ± 3.2                  | ***p<0.001     |
| Parvalbumin   | 75.3 ± 3.5                   | 54.6 ± 3.0                   | ***p<0.001     |
| <b>P91</b>    |                              |                              |                |
| CUX1          | 470.5 ± 13.0                 | 435.2 ± 9.9                  | -              |
| TBR1          | 1268.6 ± 53.3                | 1218.4 ± 75.1                | -              |
| NeuN          | 1167.9 ± 37.1                | 1168.0 ± 55.0                | -              |
| Olig2         | 206.8 ± 2.5                  | 188.0 ± 8.2                  | -              |
| Somatostatin  | 63.3 ± 4.4                   | 59.2 ± 5.8                   | -              |
| Calbindin     | 62.2 ± 5.8                   | 51.6 ± 4.4                   | -              |
| Calretinin    | 77.0 ± 4.2                   | 71.2 ± 6.6                   | -              |
| GABA          | 122.1 ± 9.8                  | 76.2 ± 6.8                   | ***p<0.001     |
| Parvalbumin   | 82.9 ± 4.8                   | 52.4 ± 2.7                   | ***p<0.001     |

**Supplementary Table 2. Genomic sequence analysis of *Arid1b* knockout alleles**

|                                                                             | Sequence                                                                                                                                                                                                                                                                                                                                                                                                                                                                                                                                                                                                                                                                                                                                                                                                                                                                                                                                                                                                                                                                                                                                                                                                                                                                                                                                                                                                                                                                                                                                                                                                                                                                                                                                                                                                                                                                                                                                                                                                             |
|-----------------------------------------------------------------------------|----------------------------------------------------------------------------------------------------------------------------------------------------------------------------------------------------------------------------------------------------------------------------------------------------------------------------------------------------------------------------------------------------------------------------------------------------------------------------------------------------------------------------------------------------------------------------------------------------------------------------------------------------------------------------------------------------------------------------------------------------------------------------------------------------------------------------------------------------------------------------------------------------------------------------------------------------------------------------------------------------------------------------------------------------------------------------------------------------------------------------------------------------------------------------------------------------------------------------------------------------------------------------------------------------------------------------------------------------------------------------------------------------------------------------------------------------------------------------------------------------------------------------------------------------------------------------------------------------------------------------------------------------------------------------------------------------------------------------------------------------------------------------------------------------------------------------------------------------------------------------------------------------------------------------------------------------------------------------------------------------------------------|
| <i>Arid1b</i><br>conditional<br>allele (floxed)                             | TCCAGCCTTACTGAGCTGACCACCTAGGAGAAGTGCACACCAGCAGCCTGTCTCTCATTCT<br>GGGCATCCAGGCCTGTAAGCACAGCCACAACTCCTTACCCATTACAGTGTCTCTCCCATCT<br>TGCCCTGCCTTCTCTCAGTTGCCTTGTCTCCCTGAGGAGCATAGCCTTAAGCAGTTACTACT<br>CCAGACCTCTGTTCTGTGGGTTTTTCAAGTAGAGCTTCTAGTAACTTCTCTGAGGGTGTGT<br>AGTCAAATTAGATGGTATTAACAGTGCAGAATTGCTAAGGCGCATA(Intron4)ACGATACCACGAT<br>ATCAACAAGTTTGTACAAAAAGCAGGCTGGCGCCGGAACCGAAGTTCCATTCCGAAGTTCC<br>TATTCTCTAGAAAATATAGGAACTTC(FRT)GTCGAGA TAACTTCGTATAGCATAACATATACGAAG<br>TTAT(loxP)GTCGAGATCTAGACCCAGCTTTCTGTACAAAGTGGTTGATATCTCTATAGTCCG<br>AGTAGGCGGGCAAATGTACTATTTTTATATATTGCTTAAAGATGAGAGAATTTTTCATCACAAAAT<br>TCAGTTATAATTTTGACCATTATATATTACAACATCCCAGCTTGAATTTCTTATGACAGTTTCCC<br>CAAGCCTATAGTTGCTCAGTTCAGTGAAGTCTTCTGTAGGACCACTTCTTATCCATCCCAGT<br>GGTAACTTGCTAAGCAGAGTGTGCCTGATACAGCACTTACATAGGCATATAGCTGGGTGCTG<br>GTGGAGGAAGGGGAACCGTCAAGCCATTTGTGAGTGC AAGGTGCAGCTTGCCTCATGTTTAA<br>TTGATACCAAGGCCTTCTGTGTGAGTTTGTGGAGTCTGGTGAGAAGTGGCCACTCTGAGTAG<br>ACTCCACTAGTGTGAAGAATCTGGTCTTACCATTGACAGTCTCTAAAGGATGGCCTG<br>TGGCTTTCAAACCATGCTTCCCGTGTCTGCTGCTACGGCCATGTGTATGAACACCCGCTTTC<br>TCTTTCTTCTCAGGACCTGTCTGGCTCCATCGATGACCTCCCCACGGGAACAGAAGCAACTC<br>TGAGCTCAGCAGTCAGTGCATCCGGGTCTACAAGCAGCCAGGGAGATCAGAGCAACCCAGC<br>GCAGTCTCCTTTCTCCCCACATGCATCACCTCACCTCTCCAGCATCCCTGGAGGGCCGTCA<br>CTTCTCCTGTTGGCTCTCCTGTGGGAAGCAACCAATCGAGGTCTGGTCCGATCTCCCTGCG<br>AGTATCCAGGTACTGCCATCTCCTGGTCCCACCCCTCATTACCCCAACCCCAAGCC<br>CCATGT(exon5)GAAGACAGGTCTGGCTTAGCAGCGGCTCTCAAACCTGCTTCCATAGGCACT<br>CTGTTTTACTCCTTAAAACCATGGGCATGTTTACATATTAGGGATATAACAGAGTTCCCTGCCAA<br>ATATACAAGAGTCCCAGTTTATAAAGAGTCAACCAATGAATGATAGATAAATGCCAGCTACTTTA<br>GATGAGACAGCCAGAAGTGTCTAACTACTTTTAAAAGTTCAGTTTTCCAGAAAGCAACCCCTT<br>TAGTGTCTCCTGTCTTGAATCCCCCTGTAGTAAGGATCCTCCATCAGAGATGGCGCAACGCAA<br>TTAATGA TAACTTCGTATAGCATAACATATACGAAGTTAT(loxP)GGTCTGAGCTCGCCATCAGTTCA<br>AATAACTTGGGGATTATTTTCTGACATGTTTTACAGTTGATGCTCATCTATGATCACAGTCACACA<br>CCGATTGTGCCCAACTACAGTCCAAAGTGTGTGCTGATACAAGCTCAAACCTTTGTT(intron5) |
| Tissue-specific<br><i>Arid1b</i><br>knockout allele<br>(after Cre<br>cross) | TTGTAGTCAAATTAGATGGTATTAACAGTGCAGAATTGCTAAGGCGCATA(Intron4)ACGATACC<br>ACGATATCAACAAGTTTGTACAAAAAGCAGGCTGGCGCCGGAACCGAAGTTCCATTCCGA<br>AGTTCCATTCTCTAGAAAATATAGGAACTTC(FRT)GTCGAGA TAACTTCGTATAGCATAACAT<br>ATACGAAGTTAT(loxP)GGTCTGAGCTCGCCATCAGTTCAATAACTTGGGGATTATTTTCTGACA<br>TGTTTTACAGTTGATGCTCATCTATGATCACAGTCACACACCGATTGTGCCCAACTACAGTCC<br>AAAGTGTGTGCTGATACAAGCTCAAACCTTTGTT(intron5)                                                                                                                                                                                                                                                                                                                                                                                                                                                                                                                                                                                                                                                                                                                                                                                                                                                                                                                                                                                                                                                                                                                                                                                                                                                                                                                                                                                                                                                                                                                                                                                                                     |
| <i>Arid1b</i> KO<br>allele                                                  | GAAGGCACATGGCTGAATATCGACGTTTTCCATATGGGGATTGGTGGCGACGACTCCTGGAG<br>CCCGTCAGTATCGGCGGAATCCAGCTGAGCGCCGGTCTGCTACCAATTACCAGTTGGTCTGGT<br>GTCAAAAATAAT(LacZ)AATAACCGGGCAGGGGGATCTAAGCTCTAGATAAGTAATGATCATA<br>ATCAGCCATATCACATCTGTAGAGTTTTACTTGTCTTTAAAAAACCTCCACACCTCCCCTGA<br>ACC(SV40polyA)TGAAACATAAAAATGAATGCAATTGTTGTTGTTAACTTGTATTATGCAGCTTAT<br>AATGGTTACAAATAAAGCAATAGCATCACAAATTTACAAATAAAGCATTTTTTCACTGCATTC<br>TAGTTGTGGTTTGTCCAAACTCATCAATGTATCTTATCATGTCTGGATCCGGAA TAACTTCGTA<br>TAGCATAACATTATACGAAGTTAT(loxP)GGTCTGAGCTCGCCATCAGTTCAATAACTTGGGGATT<br>ATTTTCTGACATGTTTTACAGTTGATGCTCATCTATGATCACAGTCACACACCGATTGTGCCCA<br>ACTACAGTCCAAAGTGTGTGCTGATACAAGCTCAAACCTTTGTT(intron5)                                                                                                                                                                                                                                                                                                                                                                                                                                                                                                                                                                                                                                                                                                                                                                                                                                                                                                                                                                                                                                                                                                                                                                                                                                                                                                                          |

**Supplementary Table 3. Summary of behavioral statistical data**

| Test                     | Duration | Measurement           | Number of animals                                                     | Values                                                                                                                                                                                                                         | Statistical Test                                                                           |                                    |
|--------------------------|----------|-----------------------|-----------------------------------------------------------------------|--------------------------------------------------------------------------------------------------------------------------------------------------------------------------------------------------------------------------------|--------------------------------------------------------------------------------------------|------------------------------------|
| Morris water maze        | 1 min    | Escape latency (sec)  | <i>Arid1b</i> <sup>+/+</sup> = 8<br><i>Arid1b</i> <sup>+/-</sup> = 10 | Day1                                                                                                                                                                                                                           | <i>Arid1b</i> <sup>+/+</sup> = 57.78 ± 1.17<br><i>Arid1b</i> <sup>+/-</sup> = 57.93 ± 1.15 | Two-tailed Student's <i>t</i> test |
|                          |          |                       |                                                                       | Day2                                                                                                                                                                                                                           | <i>Arid1b</i> <sup>+/+</sup> = 47.19 ± 2.94<br><i>Arid1b</i> <sup>+/-</sup> = 46.00 ± 2.85 |                                    |
|                          |          |                       |                                                                       | Day3                                                                                                                                                                                                                           | <i>Arid1b</i> <sup>+/+</sup> = 36.47 ± 3.54<br><i>Arid1b</i> <sup>+/-</sup> = 39.88 ± 3.33 |                                    |
|                          |          |                       |                                                                       | Day4                                                                                                                                                                                                                           | <i>Arid1b</i> <sup>+/+</sup> = 24.22 ± 3.65<br><i>Arid1b</i> <sup>+/-</sup> = 34.14 ± 4.33 |                                    |
|                          |          |                       |                                                                       | Day5                                                                                                                                                                                                                           | <i>Arid1b</i> <sup>+/+</sup> = 13.97 ± 2.03<br><i>Arid1b</i> <sup>+/-</sup> = 34.28 ± 3.26 |                                    |
|                          |          |                       |                                                                       | Day6                                                                                                                                                                                                                           | <i>Arid1b</i> <sup>+/+</sup> = 14.53 ± 1.84<br><i>Arid1b</i> <sup>+/-</sup> = 36.25 ± 3.28 |                                    |
|                          |          |                       |                                                                       | Day7                                                                                                                                                                                                                           | <i>Arid1b</i> <sup>+/+</sup> = 14.41 ± 2.46<br><i>Arid1b</i> <sup>+/-</sup> = 34.25 ± 3.55 |                                    |
|                          |          |                       |                                                                       | Day8                                                                                                                                                                                                                           | <i>Arid1b</i> <sup>+/+</sup> = 9.78 ± 1.48<br><i>Arid1b</i> <sup>+/-</sup> = 28.38 ± 3.71  |                                    |
|                          |          |                       |                                                                       | Day9                                                                                                                                                                                                                           | <i>Arid1b</i> <sup>+/+</sup> = 10.34 ± 1.36<br><i>Arid1b</i> <sup>+/-</sup> = 29.75 ± 3.35 |                                    |
|                          |          |                       |                                                                       | Day10                                                                                                                                                                                                                          | <i>Arid1b</i> <sup>+/+</sup> = 8.16 ± 1.14<br><i>Arid1b</i> <sup>+/-</sup> = 24.40 ± 3.57  |                                    |
|                          |          | Platform crossing     |                                                                       | <i>Arid1b</i> <sup>+/+</sup> = 6.13 ± 0.88<br><i>Arid1b</i> <sup>+/-</sup> = 2.00 ± 0.69                                                                                                                                       |                                                                                            |                                    |
|                          |          | Distance moved (cm)   |                                                                       | <i>Arid1b</i> <sup>+/+</sup> = 939.71 ± 56.11<br><i>Arid1b</i> <sup>+/-</sup> = 949.14 ± 71.96                                                                                                                                 |                                                                                            |                                    |
|                          |          | Velocity (cm/s)       |                                                                       | <i>Arid1b</i> <sup>+/+</sup> = 22.64 ± 2.28<br><i>Arid1b</i> <sup>+/-</sup> = 19.14 ± 1.70                                                                                                                                     |                                                                                            |                                    |
| T-maze                   | -        | Success rate (%)      | <i>Arid1b</i> <sup>+/+</sup> = 6<br><i>Arid1b</i> <sup>+/-</sup> = 6  | <i>Arid1b</i> <sup>+/+</sup> = 95.67 ± 1.89<br><i>Arid1b</i> <sup>+/-</sup> = 46.17 ± 17.51                                                                                                                                    | Two-tailed Student's <i>t</i> test                                                         |                                    |
| Novel object recognition | 10 min   | Recognition index (%) | <i>Arid1b</i> <sup>+/+</sup> = 9<br><i>Arid1b</i> <sup>+/-</sup> = 8  | <i>Arid1b</i> <sup>+/+</sup> ; Familiar = 36.81 ± 3.70<br><i>Arid1b</i> <sup>+/+</sup> ; Novel = 63.19 ± 3.70<br><i>Arid1b</i> <sup>+/-</sup> ; Familiar = 52.68 ± 4.51<br><i>Arid1b</i> <sup>+/-</sup> ; Novel = 47.32 ± 4.51 | Two-tailed Student's <i>t</i> test                                                         |                                    |
| Rotarod                  | 5 min    | Latency to fall (sec) | <i>Arid1b</i> <sup>+/+</sup> = 6<br><i>Arid1b</i> <sup>+/-</sup> = 6  | Day1<br><i>Arid1b</i> <sup>+/+</sup> = 157.72 ± 17.72<br><i>Arid1b</i> <sup>+/-</sup> = 170.50 ± 17.74                                                                                                                         | Two-tailed Student's <i>t</i> test                                                         |                                    |

|                    |        |                             |                                                                        |                      |                                                                                                                                                                                                                                                        |                                    |
|--------------------|--------|-----------------------------|------------------------------------------------------------------------|----------------------|--------------------------------------------------------------------------------------------------------------------------------------------------------------------------------------------------------------------------------------------------------|------------------------------------|
|                    |        |                             |                                                                        | Day2                 | <i>Arid1b</i> <sup>+/+</sup> = 201.78 ± 20.73<br><i>Arid1b</i> <sup>+/-</sup> = 212.17 ± 21.25                                                                                                                                                         |                                    |
|                    |        |                             |                                                                        | Day3                 | <i>Arid1b</i> <sup>+/+</sup> = 248.33 ± 13.79<br><i>Arid1b</i> <sup>+/-</sup> = 211.94 ± 16.35                                                                                                                                                         |                                    |
|                    |        |                             |                                                                        | Day4                 | <i>Arid1b</i> <sup>+/+</sup> = 240.94 ± 11.66<br><i>Arid1b</i> <sup>+/-</sup> = 195.06 ± 15.57                                                                                                                                                         |                                    |
|                    |        |                             |                                                                        | Day6                 | <i>Arid1b</i> <sup>+/+</sup> = 243.00 ± 11.64<br><i>Arid1b</i> <sup>+/-</sup> = 201.29 ± 14.30                                                                                                                                                         |                                    |
|                    |        |                             |                                                                        | Day8                 | <i>Arid1b</i> <sup>+/+</sup> = 241.82 ± 12.32<br><i>Arid1b</i> <sup>+/-</sup> = 220.76 ± 16.23                                                                                                                                                         |                                    |
|                    |        |                             |                                                                        | Day10                | <i>Arid1b</i> <sup>+/+</sup> = 244.59 ± 15.52<br><i>Arid1b</i> <sup>+/-</sup> = 220.53 ± 12.29                                                                                                                                                         |                                    |
|                    |        |                             |                                                                        | Day13                | <i>Arid1b</i> <sup>+/+</sup> = 258.06 ± 15.42<br><i>Arid1b</i> <sup>+/-</sup> = 211.12 ± 15.13                                                                                                                                                         |                                    |
|                    |        |                             |                                                                        | Day16                | <i>Arid1b</i> <sup>+/+</sup> = 242.24 ± 15.37<br><i>Arid1b</i> <sup>+/-</sup> = 215.18 ± 9.45                                                                                                                                                          |                                    |
| Social Behavior    | 10 min | Time spent in chamber (sec) | <i>Arid1b</i> <sup>+/+</sup> = 11<br><i>Arid1b</i> <sup>+/-</sup> = 12 | Sociability          | <i>Arid1b</i> <sup>+/+</sup> ; Empty = 153.92 ± 21.45<br><i>Arid1b</i> <sup>+/+</sup> ; Stranger I = 362.87 ± 21.31<br><i>Arid1b</i> <sup>+/-</sup> ; Empty = 224.80 ± 34.46<br><i>Arid1b</i> <sup>+/-</sup> ; Stranger I = 298.06 ± 36.31             | Two-tailed Student's <i>t</i> test |
|                    |        |                             |                                                                        | Social novelty       | <i>Arid1b</i> <sup>+/+</sup> ; Stranger I = 173.95 ± 20.96<br><i>Arid1b</i> <sup>+/+</sup> ; Stranger II = 337.99 ± 23.88<br><i>Arid1b</i> <sup>+/-</sup> ; Stranger I = 316.39 ± 22.38<br><i>Arid1b</i> <sup>+/-</sup> ; Stranger II = 195.89 ± 21.55 |                                    |
| Social interaction | 10 min | Number of events (n)        | <i>Arid1b</i> <sup>+/+</sup> = 6<br><i>Arid1b</i> <sup>+/-</sup> = 6   | General sniffing     | <i>Arid1b</i> <sup>+/+</sup> = 30.60 ± 3.87<br><i>Arid1b</i> <sup>+/-</sup> = 16.60 ± 2.84                                                                                                                                                             | Two-tailed Student's <i>t</i> test |
|                    |        |                             |                                                                        | Anogenita I sniffing | <i>Arid1b</i> <sup>+/+</sup> = 20.40 ± 2.73<br><i>Arid1b</i> <sup>+/-</sup> = 9.80 ± 1.77                                                                                                                                                              |                                    |
|                    |        |                             |                                                                        | Following            | <i>Arid1b</i> <sup>+/+</sup> = 6.00 ± 2.43<br><i>Arid1b</i> <sup>+/-</sup> = 1.80 ± 0.66                                                                                                                                                               |                                    |

|                           |        |                               |                                                                                                                              |  |          |                                                                                                                                       |                                    |
|---------------------------|--------|-------------------------------|------------------------------------------------------------------------------------------------------------------------------|--|----------|---------------------------------------------------------------------------------------------------------------------------------------|------------------------------------|
|                           |        |                               |                                                                                                                              |  | Mounting | $Arid1b^{+/+} = 1.00 \pm 0.77$<br>$Arid1b^{+/-} = 0.20 \pm 0.20$                                                                      |                                    |
|                           |        |                               |                                                                                                                              |  | Fighting | $Arid1b^{+/+} = 0.20 \pm 0.20$<br>$Arid1b^{+/-} = 0.20 \pm 0.20$                                                                      |                                    |
|                           |        | Total sniffing time (sec)     |                                                                                                                              |  |          | $Arid1b^{+/+} = 76.54 \pm 7.21$<br>$Arid1b^{+/-} = 40.09 \pm 5.96$                                                                    |                                    |
| Spontaneous Self-Grooming | 30 min | Grooming time (%)             | $Arid1b^{+/+} = 10$<br>$Arid1b^{+/-} = 10$                                                                                   |  |          | $Arid1b^{+/+} = 9.15 \pm 1.71$<br>$Arid1b^{+/-} = 57.08 \pm 5.28$                                                                     | Two-tailed Student's <i>t</i> test |
| Elevated Plus Maze        | 5 min  | Time spent on open arm (sec)  | $Arid1b^{+/+} = 13$<br>$Arid1b^{+/-} = 12$                                                                                   |  |          | $Arid1b^{+/+} = 10.45 \pm 2.31$<br>$Arid1b^{+/-} = 2.18 \pm 0.85$                                                                     | Two-tailed Student's <i>t</i> test |
| Open field                | 5 min  | Time in center (sec)          | $Arid1b^{+/+} = 16$<br>$Arid1b^{+/-} = 20$                                                                                   |  |          | $Arid1b^{+/+} = 33.47 \pm 3.98$<br>$Arid1b^{+/-} = 7.11 \pm 0.85$                                                                     | Two-tailed Student's <i>t</i> test |
|                           |        | Number of entries into center |                                                                                                                              |  |          | $Arid1b^{+/+} = 18.06 \pm 2.28$<br>$Arid1b^{+/-} = 5.85 \pm 1.46$                                                                     |                                    |
| Forced swim               | 5 min  | Immobility time (sec)         | $Arid1b^{+/+} = 12$<br>$Arid1b^{+/-} = 13$                                                                                   |  |          | $Arid1b^{+/+} = 55.64 \pm 7.30$<br>$Arid1b^{+/-} = 179.98 \pm 11.14$                                                                  | Two-tailed Student's <i>t</i> test |
| Tail suspension           | 5 min  | Immobility time (sec)         | $Arid1b^{+/+} = 12$<br>$Arid1b^{+/-} = 13$                                                                                   |  |          | $Arid1b^{+/+} = 77.39 \pm 6.86$<br>$Arid1b^{+/-} = 154.78 \pm 11.86$                                                                  | Two-tailed Student's <i>t</i> test |
| Novel object recognition  | 10 min | Recognition index (%)         | $Arid1b^{+/+} = 8$<br>Clonazepam-treated $Arid1b^{+/+} = 10$<br>$Arid1b^{+/-} = 7$<br>Clonazepam-treated $Arid1b^{+/-} = 10$ |  |          | $Arid1b^{+/+}$ ; Familiar = $31.30 \pm 2.81$<br>$Arid1b^{+/+}$ ; Novel = $68.70 \pm 2.81$                                             | Two-tailed Student's <i>t</i> test |
|                           |        |                               |                                                                                                                              |  |          | Clonazepam-treated $Arid1b^{+/+}$ ; Familiar = $29.72 \pm 2.72$<br>Clonazepam-treated $Arid1b^{+/+}$ ; Novel = $70.44 \pm 3.05$       |                                    |
|                           |        |                               |                                                                                                                              |  |          | $Arid1b^{+/-}$ ; Familiar = $50.09 \pm 6.00$<br>$Arid1b^{+/-}$ ; Novel = $54.52 \pm 2.83$                                             |                                    |
|                           |        |                               |                                                                                                                              |  |          | Clonazepam-treated $Arid1b^{+/-}$ ; Familiar = $30.87 \pm 3.55$<br>Clonazepam-treated $Arid1b^{+/-}$ ; Novel = $69.13 \pm 3.55$       |                                    |
| Social Behavior           | 10 min | Time spent in chamber (sec)   | $Arid1b^{+/+} = 9$<br>Clonazepam-treated $Arid1b^{+/+} = 9$<br>$Arid1b^{+/-} = 7$<br>Clonazepam-treated $Arid1b^{+/-} = 9$   |  |          | $Arid1b^{+/+}$ ; Empty = $188.76 \pm 13.47$<br>$Arid1b^{+/+}$ ; Stranger I = $310.91 \pm 14.90$                                       | Two-tailed Student's <i>t</i> test |
|                           |        |                               |                                                                                                                              |  |          | Clonazepam-treated $Arid1b^{+/+}$ ; Empty = $133.69 \pm 16.40$<br>Clonazepam-treated $Arid1b^{+/+}$ ; Stranger I = $244.97 \pm 7.63$  |                                    |
|                           |        |                               |                                                                                                                              |  |          | $Arid1b^{+/-}$ ; Empty = $235.67 \pm 34.60$<br>$Arid1b^{+/-}$ ; Stranger I = $214.74 \pm 39.46$                                       |                                    |
|                           |        |                               |                                                                                                                              |  |          | Clonazepam-treated $Arid1b^{+/-}$ ; Empty = $208.78 \pm 17.96$<br>Clonazepam-treated $Arid1b^{+/-}$ ; Stranger I = $251.99 \pm 15.02$ |                                    |
|                           |        |                               |                                                                                                                              |  | Social   | $Arid1b^{+/+}$ ; Stranger I = $178.99 \pm 16.85$<br>$Arid1b^{+/+}$ ; Stranger II = $322.63 \pm 15.05$                                 |                                    |

|                          |        |                               |                                                                                                                                                  |                                                                                                                                                                                                                                                                                                                                                                                                                                                                                                                                                                          |                                               |
|--------------------------|--------|-------------------------------|--------------------------------------------------------------------------------------------------------------------------------------------------|--------------------------------------------------------------------------------------------------------------------------------------------------------------------------------------------------------------------------------------------------------------------------------------------------------------------------------------------------------------------------------------------------------------------------------------------------------------------------------------------------------------------------------------------------------------------------|-----------------------------------------------|
|                          |        |                               |                                                                                                                                                  | $\frac{\text{Clonazepam-treated } Arid1b^{+/+}; \text{ Stranger I} = 121.22 \pm 20.19}{\text{Clonazepam-treated } Arid1b^{+/+}; \text{ Stranger II} = 316.79 \pm 44.64}$<br>$\frac{Arid1b^{+/+}; \text{ Stranger I} = 270.48 \pm 11.70}{Arid1b^{+/+}; \text{ Stranger II} = 190.16 \pm 12.69}$<br>$\frac{\text{Clonazepam-treated } Arid1b^{+/+}; \text{ Stranger I} = 171.64 \pm 20.85}{\text{Clonazepam-treated } Arid1b^{+/+}; \text{ Stranger II} = 342.24 \pm 25.96}$                                                                                               |                                               |
| Open field               | 5 min  | Time in center (sec)          | $\frac{Arid1b^{+/+} = 9}{\text{Clonazepam-treated } Arid1b^{+/+} = 8}$<br>$\frac{Arid1b^{+/+} = 9}{\text{Clonazepam-treated } Arid1b^{+/+} = 6}$ | $\frac{Arid1b^{+/+} = 6.36 \pm 1.01}{\text{Clonazepam-treated } Arid1b^{+/+} = 45.62 \pm 9.68}$<br>$\frac{Arid1b^{+/+} = 23.86 \pm 3.31}{\text{Clonazepam-treated } Arid1b^{+/+} = 20.88 \pm 4.02}$<br>$\frac{Arid1b^{+/+} = 4.22 \pm 0.92}{\text{Clonazepam-treated } Arid1b^{+/+} = 17.67 \pm 3.60}$                                                                                                                                                                                                                                                                   | one-way ANOVA with Bonferonni correction test |
|                          |        | Number of entries into center |                                                                                                                                                  |                                                                                                                                                                                                                                                                                                                                                                                                                                                                                                                                                                          |                                               |
| Forced swim              | 5 min  | Immobility time (sec)         | $\frac{Arid1b^{+/+} = 6}{\text{Clonazepam-treated } Arid1b^{+/+} = 6}$<br>$\frac{Arid1b^{+/+} = 6}{\text{Clonazepam-treated } Arid1b^{+/+} = 6}$ | $\frac{Arid1b^{+/+} = 58.67 \pm 19.11}{\text{Clonazepam-treated } Arid1b^{+/+} = 57.05 \pm 13.55}$<br>$\frac{Arid1b^{+/+} = 160.18 \pm 21.15}{\text{Clonazepam-treated } Arid1b^{+/+} = 107.02 \pm 30.48}$                                                                                                                                                                                                                                                                                                                                                               | one-way ANOVA with Bonferonni correction test |
|                          |        |                               |                                                                                                                                                  |                                                                                                                                                                                                                                                                                                                                                                                                                                                                                                                                                                          |                                               |
| Tail suspension          | 5 min  | Immobility time (sec)         | $\frac{Arid1b^{+/+} = 6}{\text{Clonazepam-treated } Arid1b^{+/+} = 6}$<br>$\frac{Arid1b^{+/+} = 6}{\text{Clonazepam-treated } Arid1b^{+/+} = 6}$ | $\frac{Arid1b^{+/+} = 74.36 \pm 19.97}{\text{Clonazepam-treated } Arid1b^{+/+} = 100.58 \pm 20.64}$<br>$\frac{Arid1b^{+/+} = 197.01 \pm 11.36}{\text{Clonazepam-treated } Arid1b^{+/+} = 165.09 \pm 18.57}$                                                                                                                                                                                                                                                                                                                                                              | one-way ANOVA with Bonferonni correction test |
|                          |        |                               |                                                                                                                                                  |                                                                                                                                                                                                                                                                                                                                                                                                                                                                                                                                                                          |                                               |
| Novel object recognition | 10 min | Recognition index (%)         | $\frac{Arid1b^{+/+}; Dlx5/6-Cre-IRES-EGFP = 6}{Arid1b^{Lox/+}; Dlx5/6-Cre-IRES-EGFP = 6}$                                                        | $\frac{Arid1b^{+/+}; \text{Familiar} = 30.51 \pm 3.64}{Arid1b^{+/+}; \text{Novel} = 57.99 \pm 4.09}$<br>$\frac{Arid1b^{+/+}; \text{Familiar} = 41.96 \pm 2.12}{Arid1b^{+/+}; \text{Novel} = 44.35 \pm 2.12}$                                                                                                                                                                                                                                                                                                                                                             | Two-tailed Student's <i>t</i> test            |
|                          |        |                               |                                                                                                                                                  |                                                                                                                                                                                                                                                                                                                                                                                                                                                                                                                                                                          |                                               |
| Social Behavior          | 10 min | Time spent in chamber (sec)   | $\frac{Arid1b^{+/+}; Dlx5/6-Cre-IRES-EGFP = 6}{Arid1b^{Lox/+}; Dlx5/6-Cre-IRES-EGFP = 7}$                                                        | $\frac{Arid1b^{+/+}; Dlx5/6-Cre; \text{Empty} = 159.93 \pm 19.51}{Arid1b^{+/+}; Dlx5/6-Cre; \text{Stranger I} = 356.68 \pm 21.87}$<br>$\frac{Arid1b^{Lox/+}; Dlx5/6-Cre; \text{Empty} = 248.52 \pm 23.18}{Arid1b^{Lox/+}; Dlx5/6-Cre; \text{Stranger I} = 248.01 \pm 18.05}$<br>$\frac{Arid1b^{+/+}; Dlx5/6-Cre; \text{Stranger I} = 219.91 \pm 17.78}{Arid1b^{+/+}; Dlx5/6-Cre; \text{Stranger II} = 312.37 \pm 13.04}$<br>$\frac{Arid1b^{Lox/+}; Dlx5/6-Cre; \text{Stranger I} = 329.73 \pm 43.07}{Arid1b^{Lox/+}; Dlx5/6-Cre; \text{Stranger II} = 252.87 \pm 18.02}$ | Two-tailed Student's <i>t</i> test            |
|                          |        |                               |                                                                                                                                                  |                                                                                                                                                                                                                                                                                                                                                                                                                                                                                                                                                                          |                                               |
| Open field               | 5 min  | Time in center (sec)          | $\frac{Arid1b^{+/+}; Dlx5/6-Cre-IRES-EGFP = 11}{11}$                                                                                             | $\frac{Arid1b^{+/+}; Dlx5/6-Cre = 17.23 \pm 1.78}{Arid1b^{Lox/+}; Dlx5/6-Cre = 9.38 \pm 0.91}$                                                                                                                                                                                                                                                                                                                                                                                                                                                                           | Two-tailed Student's <i>t</i> test            |
|                          |        | Number of                     |                                                                                                                                                  | $\frac{Arid1b^{+/+}; Dlx5/6-Cre = 16.79 \pm 2.43}{11}$                                                                                                                                                                                                                                                                                                                                                                                                                                                                                                                   |                                               |

|                           |        |                     |                                                         |                                                                   |                                    |
|---------------------------|--------|---------------------|---------------------------------------------------------|-------------------------------------------------------------------|------------------------------------|
|                           |        | entries into center | <i>Arid1b<sup>Lox/+</sup>;Dlx5/6-Cre-IRES-EGFP</i> = 11 | <i>Arid1b<sup>Lox/+</sup>;Dlx5/6-Cre</i> = 9.73 ± 1.44            |                                    |
| Spontaneous Self-Grooming | 30 min | Grooming time (%)   | <i>Arid1b<sup>+/+</sup>;Dlx5/6-Cre-IRES-EGFP</i> = 5    | <i>Arid1b<sup>+/+</sup>;Dlx5/6-Cre-IRES-EGFP</i> = 9.67 ± 1.08    | Two-tailed Student's <i>t</i> test |
|                           |        |                     | <i>Arid1b<sup>Lox/+</sup>;Dlx5/6-Cre-IRES-EGFP</i> = 5  | <i>Arid1b<sup>Lox/+</sup>;Dlx5/6-Cre-IRES-EGFP</i> = 55.23 ± 2.77 |                                    |
|                           |        |                     | <i>Arid1b<sup>+/+</sup>;Nkx2.1-Cre</i> = 5              | <i>Arid1b<sup>+/+</sup>;Nkx2.1-Cre</i> = 10.86 ± 2.21             |                                    |
|                           |        |                     | <i>Arid1b<sup>Lox/+</sup>; Nkx2.1-Cre</i> = 5           | <i>Arid1b<sup>Lox/+</sup>; Nkx2.1-Cre</i> = 22.37 ± 3.15          |                                    |

**Supplementary Table 4. Primer sequences for real-time PCR**

| <b>Gene</b>    | <b>Primer sequence (5' → 3')</b>                   | <b>Accession No.</b> |
|----------------|----------------------------------------------------|----------------------|
| <i>Arid1b</i>  | F: tccctggaagatgattctgg<br>R: aacttactggcctgctttgg | NM_001085355         |
| <i>Gad1</i>    | F: tggagctggctgattacctc<br>R: ccatggttgctctgactcc  | NM_008077            |
| <i>Gad2</i>    | F: ccgagaaggctatgaaatgg<br>R: ctgtcccctaagggttgg   | NM_008078            |
| <i>Gepn</i>    | F: ttgcactaccaggaatcct<br>R: tcttggtgatccaagtcag   | NM_145965            |
| <i>Arhgef9</i> | F: caaggaaacggaagaagtgc<br>R: gggcagagttgacaccttc  | NM_001033329         |
| <i>Slc17a7</i> | F: acactgtctgggatggtgtg<br>R: gccacaagccacacttct   | NM_182993            |
| <i>Dlg4</i>    | F: ccgacaagttggatcctgt<br>R: tctgtacctctcgacaga    | NM_001109752         |
| <i>Gabra1</i>  | F: gtggtccagaaaagccaaa<br>R: ggttttctgggttctgggtg  | NM_010250            |
| <i>Gabrb2</i>  | F: cccttctggaatgctttg<br>R: cccattactgctcggatgt    | NM_008070            |
| <i>Gabrg2</i>  | F: aacaatgccacacacctca<br>R: gaacaagcaaaaggcggttag | NM_177408            |
| <i>Chp</i>     | F: gcagcagatgaagcaacaaa<br>R: gaatgtggaggtgggattg  | NM_001025432         |
| <i>Ep300</i>   | F: ctccacacatgtttctcca<br>R: gtctgattatcgctgctca   | NM_177821            |
| <i>Pcaf</i>    | F: taaggtccccatggatctg<br>R: tcaatcaaccctgcttctt   | NM_001190846         |
| <i>Kat5</i>    | F: ccaaggaaaaggaatccaca<br>R: caagatggttgggaccagt  | NM_001199247         |
| <i>Hdac1</i>   | F: tccatctgctcctctgacaa<br>R: gcttctggcttctctctt   | NM_008228            |
| <i>Hdac2</i>   | F: acggatagcttgcatgaag<br>R: ttgggtctgtttctcacc    | NM_008229            |
| <i>Hdac3</i>   | F: cagatccgccagacaatctt<br>R: tcctgtcgttgcctggtc   | NM_010411            |



|                    |                                                     |              |
|--------------------|-----------------------------------------------------|--------------|
| <i>Hdac4</i>       | F: agtgatggacatccacagca<br>R: agtgggtggtcctcctccat  | NM_207225    |
| <i>Histone H1</i>  | F: catcaccaccaaggtgtcag<br>R: gggcttttggtaccttctt   | NM_030609    |
| <i>Histone H2A</i> | F: acgaggagctcaacaagctg<br>R: ttacttccccttggccttgt  | NM_175660    |
| <i>Histone H3</i>  | F: actggagggtgaagaacc<br>R: ataggcctcacttgcctcct    | NM_008210    |
| <i>Histone H4</i>  | F: aacatccagggcattaccaa<br>R: accacgtccatagccgtaac  | NM_175652    |
| <i>Parvalbumin</i> | F: gggcctgaagaaaagaacc<br>R: ttctcaacccaatcttgc     | NM_013645    |
| <i>Ntrk2</i>       | F: tgggtcattccattcactgt<br>R: cttggccatcagggtgtagt  | NM_008745    |
| <i>Cyclin D1</i>   | F: tcctctcaaaaatgccagag<br>R: gcaggagaggaagtgttgg   | NM_007631    |
| <i>c-Myc</i>       | F: acacggaggaaaaacgacaag<br>R: agaggtgagcttgtgctcgt | NM_001177352 |
| <i>n-Myc</i>       | F: gttccagcaaaagcgaagag<br>R: ggtggccttttcaagatga   | NM_008709    |
| <i>Creb</i>        | F: tcagccgggtactaccattc<br>R: ttcagcaggctgttaggaa   | NM_001037726 |
| <i>Lef1</i>        | F: aggagcccaaaagacctcat<br>R: gctgtctctttccgtgct    | NM_001276402 |
| <i>Tcf3</i>        | F: cgacatcaatgaggccttta<br>R: ctgcttgggggtcaggtt    | NM_001164147 |
| <i>Tcf4</i>        | F: accaagctcctgattctcca<br>R: catctgtcccatgtgattcg  | NM_001083967 |
| <i>Tcf7</i>        | F: atgagagccaaggtcattgc<br>R: gaccgctcttcttcttcc    | NM_001313981 |
| <i>Pttg1</i>       | F: agttttgacctgctgagga<br>R: tcaacatccagagtggagagg  | NM_001131054 |
| <i>Fgf18</i>       | F: actacacggccctgatgtct<br>R: cgcttgggtgactgtgggtga | NM_008005    |
| <i>Ctnnb1</i>      | F: acgcagctgctgtcctattc                             | NM_001165902 |

|                                              |                                |              |
|----------------------------------------------|--------------------------------|--------------|
|                                              | R: aagaacggtagctgggatca        |              |
| <i>Wnt2b</i>                                 | F: caccggactgatctgtct          | NM_009520    |
|                                              | R: ggaattgcactcacactgg         |              |
| <i>Wnt3</i>                                  | F: acgagaactccccaacttt         | NM_009521    |
|                                              | R: gacatagcagcaccagtgga        |              |
| <i>Wnt3a</i>                                 | F: acccaacttctgcgaaccta        | NM_009522    |
|                                              | R: ctgacgtagcagcaccaatg        |              |
| <i>Wnt5a</i>                                 | F: tggctacatcgaccccagt         | NM_001256224 |
|                                              | R: agcagcaccagtgaaacttg        |              |
| <i>Wnt5b</i>                                 | F: actgcctgcgtaatgagacc        | NM_001271757 |
|                                              | R: cacaacctcgggtgcatttt        |              |
| <i>Wnt7b</i>                                 | F: acgcagctaccagaagccta        | NM_001163633 |
|                                              | R: tgccacacctgggtgtactg        |              |
| <i>Wnt8b</i>                                 | F: actgcctggagaacaagacc        | NM_011720    |
|                                              | R: cgcagcaccagtgaaactt         |              |
| <i>Wnt9b</i>                                 | F: gggacctggtctacatggaa        | NM_011719    |
|                                              | R: gacagtggcaggagaaaacc        |              |
| <i>Gapdh</i>                                 | F: aaggtcatcccagagctgaa        | NM_008084    |
|                                              | R: aggagacaacctggtcctca        |              |
| <i>Histone H3 CDS</i>                        | F: gaattcatggctctacaaagcagactg | NM_008210    |
|                                              | R: ggatccttaagcacgttctccgcg    |              |
| <i>Syt2</i>                                  | F: aaagtccaggtggtcgtcac        | NM_009307    |
|                                              | R: ttcttggccagaagagcatc        |              |
| <i>Pparg1a</i>                               | F: gaaaggctcaagaggatga         | NM_008904    |
|                                              | R: acggtgcattctcaatttc         |              |
| <i>Parvalbumin</i> promoter<br>+10265~+10444 | F: cccctgtctcattgtgatcc        |              |
|                                              | R: tcaactggcctcagtttaca        |              |
| <i>Parvalbumin</i> promoter<br>+7~+199       | F: catccaaggttaagcggtagc       |              |
|                                              | R: acagctgaggtccatccttg        |              |
| <i>Parvalbumin</i> promoter<br>-103~+77      | F: caaaatagccagggtgtaga        |              |
|                                              | R: gtcctttcaattggcctga         |              |
| <i>Parvalbumin</i> promoter<br>-206~-16      | F: ggatgggggtgaatgtgata        |              |
|                                              | R: tacagaaaagctgggctggt        |              |
| <i>Parvalbumin</i> promoter<br>-1889~-1645   | F: ttctcaaggagtgtccac          |              |
|                                              | R: ccaggactttgcgttgactt        |              |
| <i>Ntrk2</i> promoter<br>-177~+14            | F: ggtagcgcagttcctaagc         |              |
|                                              | R: atctgagcctcctctacca         |              |
| <i>Ntrk2</i> promoter                        | F: aagaacattggcagcacaac        |              |

|                          |                         |
|--------------------------|-------------------------|
| -646~-+462               | R: agcaaaaaccagcaggtcac |
| <i>Slc17a7</i> promoter  | F: aaagagcttggacgtgcag  |
| -272~-74                 | R: cttccaacaggctacctgga |
| <i>Dlg4</i> promoter     | F: aacccttaccacacgctat  |
| -301~-112                | R: tgggaaaggagctagaagca |
| <i>Viaat</i> promoter    | F: ggcagagacacaaacagacg |
| -284~-95                 | R: cacaaggaggaggaggttca |
| <i>Gad1</i> promoter     | F: tagacccttgcctcttgtg  |
| -269~-70                 | R: ggcgattccagaaggtttc  |
| <i>Syt2</i> promoter     | F: cactcggagaggagttgga  |
| -5~-+194                 | R: gccaggatggagaaactttg |
| <i>Syt2</i> promoter     | F: gggctctctcccctcact   |
| -115~-+10                | R: ctcctctccgaagtgccttt |
| <i>Ppargc1a</i> promoter | F: tgtcatgtgactggggactg |
| -61~-+138                | R: cccagctcacctctatgc   |
| <i>Ppargc1a</i> promoter | F: ccttgagtgacgtcaggag  |
| -152~-+28                | R: cacacagcacacactcatgc |
| <i>Gapdh</i> promoter    | F: tcaggtaccgaggaggata  |
|                          | R: cgcttgaaaaggagattgct |

---
